# Supplementary material
Source: Springer Nature journal article supplement (https://www.springermedizin.de/resource/supplementary/12889_2006_602_MOESM3_ESM.pdf/9501264)
Supplement: MOESM3 [file 9501264]

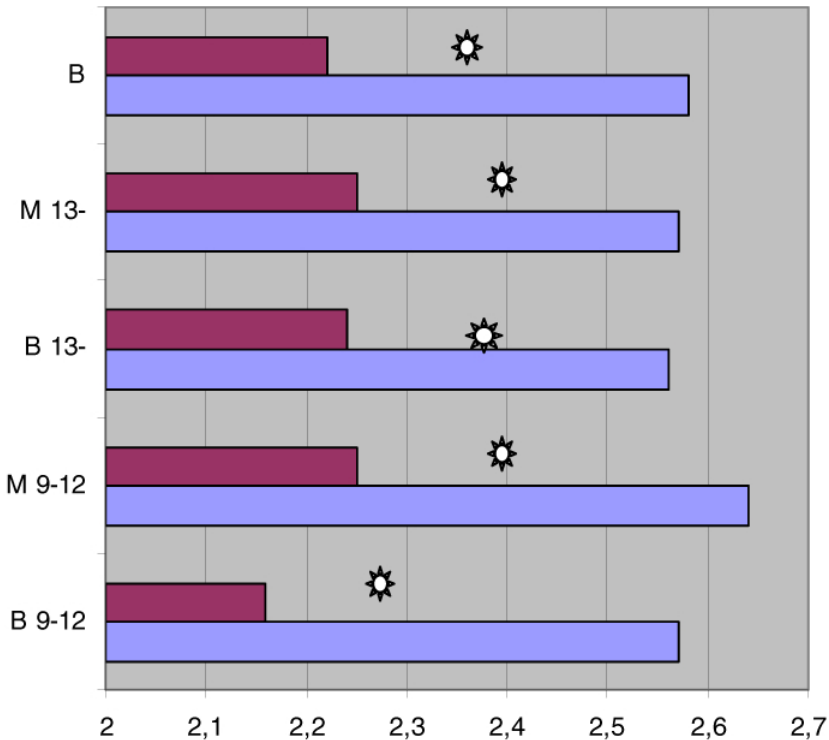

■ EMX-1    ■ EMX-2

**M** - In age groups (9-12, 13-V) – girls

**B** - In age groups (9-12, 13-V) – boys

☀ -  $p < 0.05$

**EMX-1** - Emotion indices for schoolchildren without disabilities

**EMX-2** - Emotion indices for schoolchildren with disabilities
